CORRECTION

# Correction: One-Seeded Fruits in the Core Caryophyllales: Their Origin and Structural Diversity

The *PLOS ONE* Staff

## Notice of Republication

This article was republished on May 27, 2015 to correct words that were inadvertently merged during the typesetting process. The publisher apologizes for the errors. Also, grammatical errors, hyperlinks and the author contributions were corrected. Please download this article again to view the correct version. The originally published, uncorrected article and the republished, corrected article are provided here for reference.

## Supporting Information

**S1 File. Originally published, uncorrected article.**

(PDF)

**S2 File. Republished corrected article.**

(PDF)

## Reference

1. Sukhorukov AP, Mavrodiev EV, Struwig M, Nilova MV, Dzhailova KK, Balandin SA, et al. (2015) One-Seeded Fruits in the Core Caryophyllales: Their Origin and Structural Diversity. *PLoS ONE* 10(2): e0117974. doi:[10.1371/journal.pone.0117974](https://doi.org/10.1371/journal.pone.0117974) PMID: [25710481](https://pubmed.ncbi.nlm.nih.gov/25710481/)

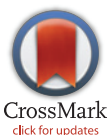

## OPEN ACCESS

**Citation:** The *PLOS ONE* Staff (2015) Correction: One-Seeded Fruits in the Core Caryophyllales: Their Origin and Structural Diversity. *PLoS ONE* 10(6): e0130783. doi:[10.1371/journal.pone.0130783](https://doi.org/10.1371/journal.pone.0130783)

**Published:** June 19, 2015

**Copyright:** © 2015 The PLOS ONE Staff. This is an open access article distributed under the terms of the [Creative Commons Attribution License](https://creativecommons.org/licenses/by/4.0/), which permits unrestricted use, distribution, and reproduction in any medium, provided the original author and source are credited.
